# Supplementary material
Source: PubMed Central journal article supplement (PMC5682232)

95 **Online repository figure legends:**

96 **Supplemental figure E1: Automated gating analysis reveals reduced**  
97 **CXCR5 expression in AIT-treated patients compared to untreated allergic**  
98 **and non-allergic controls.** a: Representative dotplots showing Tfh cells in an  
99 allergic, AIT-treated and non-allergic patient. b: Percentage Tfh in allergics  
100 (n=24), AIT-treated (n=32) and non-allergic (n=13) patients. Statistical analysis  
101 was performed using the Mann-Whitney test, one-tailed. \*\*-p<0.01.

102  
103 **Supplemental figure E2: Cytokine production after PMA/Ionomycin**  
104 **stimulation in Tfr cells ex vivo.** Intracellular cytokine staining for IL-10, IFN $\gamma$ ,  
105 IL-4 and IL-13 after 6 hours of stimulation with PMA/Ionomycin was performed in  
106 Tfr cells from 4 healthy donors. Percentage of cytokine producing cells out of the  
107 total CD4 subset is shown.

108

109

110

111 Supplemental table E1: Demographic and clinical information of donors recruited  
 112 for this study.

| <b>Donor</b> | <b>Cohort</b> | <b>Gender</b> | <b>Birth year</b> | <b>Race</b> | <b>Donation Date</b> | <b>Wheal size*</b> | <b>AIT report**</b> |
|--------------|---------------|---------------|-------------------|-------------|----------------------|--------------------|---------------------|
| D00013       | Non-allergic  | M             | 1979              | White       | 2008-07-15           | 0                  | n/a                 |
| D00014       | Non-allergic  | F             | 1982              | White       | 2008-07-15           | 0                  | n/a                 |
| D00030       | Non-allergic  | F             | 1954              | White       | 2008-08-13           | 0                  | n/a                 |
| D00032       | Non-allergic  | M             | 1982              | White       | 2008-10-13           | 0                  | n/a                 |
| D00034       | Non-allergic  | F             | 1971              | White       | 2008-10-16           | 0                  | n/a                 |
| D00036       | Non-allergic  | M             | 1987              | White       | 2008-10-21           | 0                  | n/a                 |
| D00038       | Non-allergic  | F             | 1980              | White       | 2008-10-22           | 0                  | n/a                 |
| D00049       | Non-allergic  | F             | 1957              | Hispanic    | 2008-11-21           | 0                  | n/a                 |
| D00055       | Non-allergic  | F             | 1948              | White       | 2009-01-05           | 0                  | n/a                 |
| D00082       | Non-allergic  | M             | 1976              | Black       | 2009-12-17           | 0                  | n/a                 |
| D00086       | Non-allergic  | F             | 1974              | White       | 2010-03-09           | 0                  | n/a                 |
| D00091       | Non-allergic  | M             | 1971              | Hispanic    | 2010-04-22           | 0                  | n/a                 |
| D00118       | Non-allergic  | F             | 1951              | White       | 2008-12-12           | 0                  | n/a                 |
| D00008       | Allergic      | M             | 1980              | White       | 2008-07-08           | 11                 | n/a                 |
| D00052       | Allergic      | F             | 1968              | White       | 2008-12-12           | 10                 | n/a                 |
| D00056       | Allergic      | M             | 1967              | Hispanic    | 2009-01-08           | 5                  | n/a                 |
| D00073       | Allergic      | F             | 1965              | Black       | 2009-10-26           | 12                 | n/a                 |
| D00084       | Allergic      | M             | 1979              | White       | 2009-01-20           | 17                 | n/a                 |
| D00090       | Allergic      | M             | 1967              | Hispanic    | 2009-01-08           | 10                 | n/a                 |
| D00117       | Allergic      | F             | 1958              | White       | 2011-01-24           | 36                 | n/a                 |
| D00122       | Allergic      | F             | 1972              | White       | 2011-03-01           | 20                 | n/a                 |
| D00137       | Allergic      | F             | 1985              | White       | 2012-05-22           | 6                  | n/a                 |
| D00139       | Allergic      | F             | 1961              | White       | 2012-06-07           | 48                 | n/a                 |
| D00140       | Allergic      | F             | 1977              | White       | 2012-06-12           | 10                 | n/a                 |

|        |          |   |      |               |            |    |           |
|--------|----------|---|------|---------------|------------|----|-----------|
| D00141 | Allergic | M | 1991 | White         | 2012-06-14 | 14 | n/a       |
| D00145 | Allergic | F | 1961 | White         | 2012-07-05 | 8  | n/a       |
| D00149 | Allergic | F | 1992 | White         | 2012-08-01 | 5  | n/a       |
| D00156 | Allergic | F | 1960 | Black         | 2012-08-22 | 17 | n/a       |
| D00158 | Allergic | M | 1982 | White         | 2012-09-04 | 31 | n/a       |
| D00159 | Allergic | F | 1976 | Black         | 2012-09-04 | 10 | n/a       |
| D00160 | Allergic | F | 1964 | Black         | 2012-09-11 | 31 | n/a       |
| D00161 | Allergic | F | 1981 | Hispanic      | 2012-09-11 | 17 | n/a       |
| D00163 | Allergic | M | 1984 | Black         | 2012-09-18 | 22 | n/a       |
| D00166 | Allergic | M | 1982 | White         | 2012-09-21 | 28 | n/a       |
| D00167 | Allergic | M | 1949 | White         | 2012-09-21 | 13 | n/a       |
| D00168 | Allergic | M | 1969 | White         | 2012-09-24 | 21 | n/a       |
| D00170 | Allergic | M | 1966 | White         | 2012-09-26 | 37 | n/a       |
| D00172 | Allergic | F | 1953 | White         | 2012-09-26 | 12 | n/a       |
| D00031 | AIT      | F | 1969 | Hispanic      | 2008-08-25 | 7  | yes       |
|        |          |   |      | Asian/Pacific |            |    |           |
| D00063 | AIT      | M | 1970 | Islander      | 2009-03-25 | 15 | yes       |
| D00072 | AIT      | F | 1954 | White         | 2009-10-14 | 8  | yes       |
| D00080 | AIT      | M | 1973 | White         | 2009-12-02 | 25 | yes       |
| D00087 | AIT      | M | 1973 | White         | 2010-03-23 | 18 | yes       |
| D00106 | AIT      | F | 1971 | White         | 2010-09-16 | 9  | yes       |
| D00101 | AIT      | M | 1964 | White         | 2009-11-12 | 17 | yes       |
| D00109 | AIT      | F | 1980 | Black         | 2010-09-27 | 10 | yes       |
| D00111 | AIT      | M | 1963 | White         | 2010-09-29 | 11 | yes       |
| D00114 | AIT      | F | 1961 | White         | 2010-10-21 | 11 | uncertain |
| D00126 | AIT      | M | 1969 | White         | 2011-03-14 | 17 | yes       |
| D00127 | AIT      | M | 1973 | White         | 2010-03-23 | 14 | yes       |
| D00129 | AIT      | F | 1990 | White         | 2012-01-23 | 17 | uncertain |
| D00130 | AIT      | M | 1973 | White         | 2012-01-24 | 15 | yes       |
| D00132 | AIT      | M | 1969 | White         | 2012-02-14 | 11 | yes       |
| D00133 | AIT      | M | 1973 | White         | 2012-02-14 | 11 | yes       |
| D00134 | AIT      | F | 1954 | White         | 2012-02-16 | 15 | yes       |
| D00135 | AIT      | M | 1962 | White         | 2012-03-15 | 13 | yes       |
| D00136 | AIT      | F | 1946 | White         | 2012-03-16 | 10 | yes       |
| D00142 | AIT      | F | 1984 | White         | 2012-06-28 | 5  | no        |
| D00143 | AIT      | F | 1960 | White         | 2012-06-29 | 7  | yes       |
| D00144 | AIT      | M | 1978 | White         | 2012-07-02 | 9  | yes       |
| D00146 | AIT      | M | 1982 | Black         | 2012-07-09 | 7  | yes       |
| D00147 | AIT      | M | 1981 | White         | 2012-07-25 | 6  | yes       |
| D00148 | AIT      | F | 1967 | Black         | 2012-07-25 | 10 | no        |
| D00150 | AIT      | F | 1966 | White         | 2012-08-02 | 6  | yes       |
| D00151 | AIT      | F | 1961 | White         | 2012-08-02 | 9  | no        |
| D00152 | AIT      | F | 1974 | White         | 2012-08-03 | 10 | yes       |

|        |     |   |      |       |            |    |     |
|--------|-----|---|------|-------|------------|----|-----|
| D00153 | AIT | M | 1967 | White | 2012-08-03 | 5  | yes |
| D00155 | AIT | M | 1985 | Black | 2012-08-14 | 9  | yes |
| D00157 | AIT | F | 1987 | White | 2012-08-27 | 10 | yes |
| D00162 | AIT | F | 1956 | White | 2012-09-14 | 7  | yes |

\* wheal size of skin prick test with Timothy grass

\*\* self report on whether patient felt that AIT treatment helped to improve allergic symptoms

113

114 Supplemental table E2: A list of genes significantly differentially expressed by the

115 CXCR5<sup>lo</sup> vs CXCR5<sup>hi</sup> subset. *IKZF2* and *CXCR5* shown for reference.

|    | Gene           | Protein                                | Fold change | p adjusted | Median CXCR5 <sup>Hi</sup> | Median CXCR5 <sup>Lo</sup> |
|----|----------------|----------------------------------------|-------------|------------|----------------------------|----------------------------|
| 1  | <b>CCR8</b>    | CCR8                                   | >100        | 0.008      | 0                          | 10                         |
| 2  | <b>LRRC32</b>  | Garp                                   | 33.3        | 0.001      | 2                          | 54                         |
|    |                | Zinc finger and BTB domain-containing  |             |            |                            |                            |
| 3  | <b>ZBTB32</b>  | protein 32                             | 11.6        | 0.046      | 2                          | 19                         |
| 4  | <b>ENC1</b>    | CD93                                   | 11.5        | 0.005      | 9                          | 107                        |
|    |                | Hydroxyprostaglandin dehydrogenase 15- |             |            |                            |                            |
| 5  | <b>HPGD</b>    | (NAD)                                  | 9.7         | 0.028      | 5                          | 49                         |
| 6  | <b>SEMA5A</b>  | Semaphorin 5A                          | 8.6         | 0.000      | 5                          | 41                         |
| 7  | <b>CHN1</b>    | Chimerin 1                             | 8.3         | 0.009      | 28                         | 234                        |
| 8  | <b>FOXP3</b>   | Fox p 3                                | 7.5         | 0.000      | 12                         | 91                         |
| 9  | <b>LAG3</b>    | Lag3                                   | 6.0         | 0.000      | 13                         | 77                         |
| 10 | <b>GZMA</b>    | Granzyme A                             | 6.0         | 0.000      | 44                         | 264                        |
|    |                | coiled-coil domain containing 141      |             |            |                            |                            |
| 11 | <b>CCDC141</b> |                                        | 5.5         | 0.004      | 16                         | 90                         |
| 12 | <b>MKI67</b>   | Ki67                                   | 5.5         | 0.018      | 6                          | 35                         |
| 13 | <b>RTKN2</b>   | Rhotekin 2                             | 5.3         | 0.008      | 36                         | 191                        |
| 14 | <b>CLECL1</b>  | C-type lectin like 1                   | 4.5         | 0.000      | 13                         | 59                         |
|    |                | Natural killer cell granule protein 7  |             |            |                            |                            |
| 15 | <b>NKG7</b>    |                                        | 4.0         | 0.023      | 52                         | 210                        |

|    |                  |                                          |      |       |      |      |
|----|------------------|------------------------------------------|------|-------|------|------|
| 16 | <b>LGALS3</b>    | Galectin 3                               | 4.0  | 0.004 | 75   | 302  |
| 17 | <b>CD70</b>      | CD70                                     | 3.6  | 0.020 | 3    | 11   |
| 18 | <b>CCL5</b>      | Rantes                                   | 3.6  | 0.000 | 350  | 1254 |
| 19 | <b>LOC541471</b> | n.d.                                     | 3.2  | 0.004 | 39   | 123  |
|    |                  | Zinc finger E-box-<br>binding homeobox 2 |      |       |      |      |
| 20 | <b>ZEB2</b>      |                                          | 2.9  | 0.041 | 37   | 107  |
| 21 | <b>CD200</b>     | CD200                                    | 2.9  | 0.001 | 49   | 144  |
|    |                  | Centromere protein                       |      |       |      |      |
| 22 | <b>MLF1IP</b>    | U                                        | 2.8  | 0.028 | 26   | 74   |
| 23 | <b>CST7</b>      | Cystatin-F                               | 2.6  | 0.008 | 242  | 621  |
| 24 | <b>LYAR</b>      | LYAR                                     | 2.5  | 0.008 | 148  | 366  |
| 25 | <b>SMC4</b>      | SMC-4                                    | 1.9  | 0.018 | 233  | 441  |
| 26 | <b>FLJ22184</b>  | n.d.                                     | 0.0  | 0.028 | 8    | 0    |
| 27 | <b>IKZF2</b>     | Helios                                   | 11.9 | 0.160 | 9    | 104  |
| 28 | <b>CXCR5</b>     | CXCR5                                    | 0.4  | -     | 2321 | 968  |

116  
117  
118  
119  
120

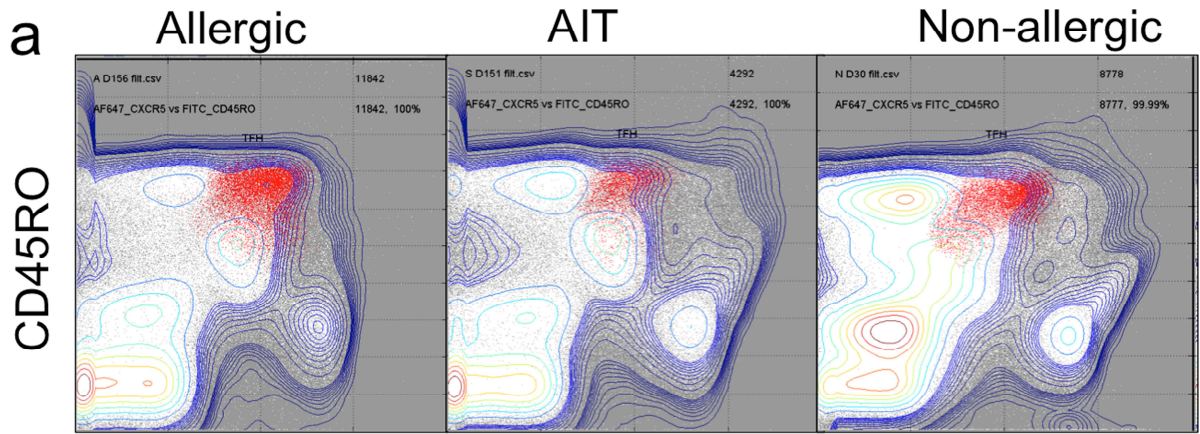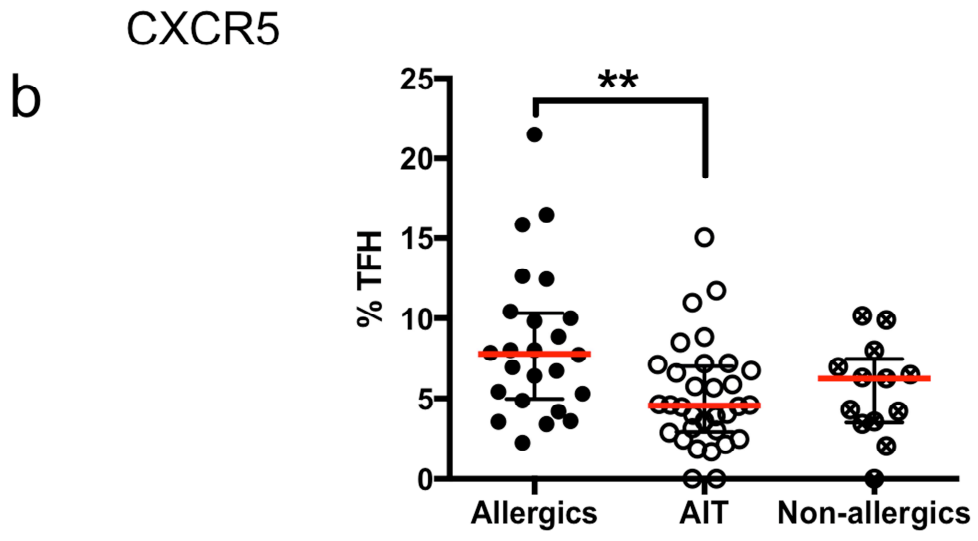

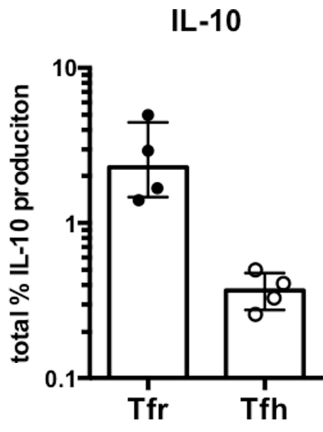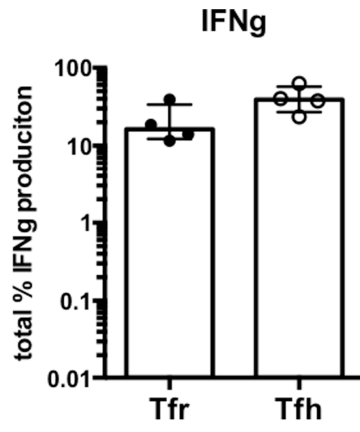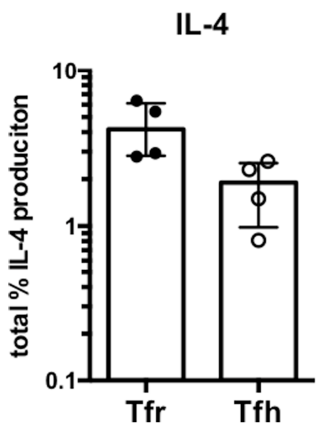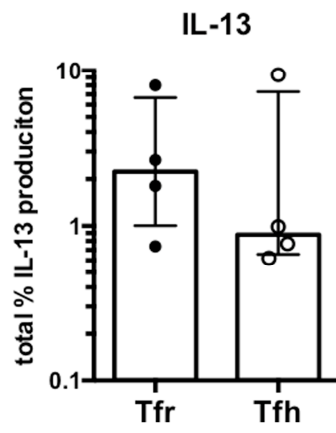

Supplement: NIHMS876435-supplement-supplement_1.pdf [file NIHMS876435-supplement-supplement_1.pdf]
